# Supplementary material
Source: publisher site journal article supplement (https://www.dovepress.com/get_supplementary_file.php?f=400207.docx)
Supplement: Supplementary file 1 [file get_supplementary_file.php]

**Table S1 Primer sequences and PCR product sizes**

| Primer name | Primer sequence(5’-3’) | PCR product sizes(bp) |
| --- | --- | --- |
| a-F | CTACTCATTGCAGCATTTGC | 250 |
| a-R | GAATATGACCTGATCTTCTG |  |
| b-F | GCGAAAGTGAACTCTTATCTCTC | 480 |
| b-R | GCTTACGCTTCTATCTCGGTGAA |  |
| c-F | TCTGTGTAGATGATGGTTCA | 250 |
| c-R | CAGAGGCAAGCTATTAGTGA |  |
| d-F | TGATGACCGATACAACCTGT | 150 |
| d-R | TCCACTCTTCAAACCATTCT |  |
| e-F | GGTAACGAATGTAGTGGTAG | 1350 |
| e-R | GCTTTACTGTATAAGTCTAG |  |
| f-F | GCTACTATCAAGTCCAAATC | 450 |
| f-R | CGCAATTATGGAAGAAAGCT |  |
| blaTEM-1-F | TAAGAGAATTATGCAGTGCTGCC | 488 |
| blaTEM-1-R | TCCATAGTTGCCTGACTCCCC |  |
| blaROB-1-F | AAGCCCGCATTGGCGTTTAT | 231 |
| blaROB-1-R | GGGCAATCGTCATGCCTTTG |  |
| ftsI-F | TTGCACATATCTCCGATGAG | 1048 |
| ftsI-R | AGCTGCTTCAGCATCTTGC |  |
|  |  |  |
